# Supplementary material for: Biological characteristics of endometriotic mesenchymal stem cells isolated from ectopic lesions of patients with endometriosis
Source: PubMed Central journal article supplement (PMC7414689; doi:10.1186/s13287-020-01856-8), 2020-08-08
Supplement: 13287_2020_1856_MOESM1_ESM.pdf [file 13287_2020_1856_MOESM1_ESM.pdf]

## **Supplemental Information**

### **Biological characteristics of endometriotic mesenchymal stem cells isolated from ectopic lesions of patients with endometriosis**

Yanli Liu, Shengying Liang, Fen Yang, Lidan Niu, Yuliang Sun, Yakun Ren, Hongmei Wang, Yanan He, Jiang Du, Xinxing Zhu, Jun Yang, Juntang Lin

## Supplemental Figure S1. Liu et al.

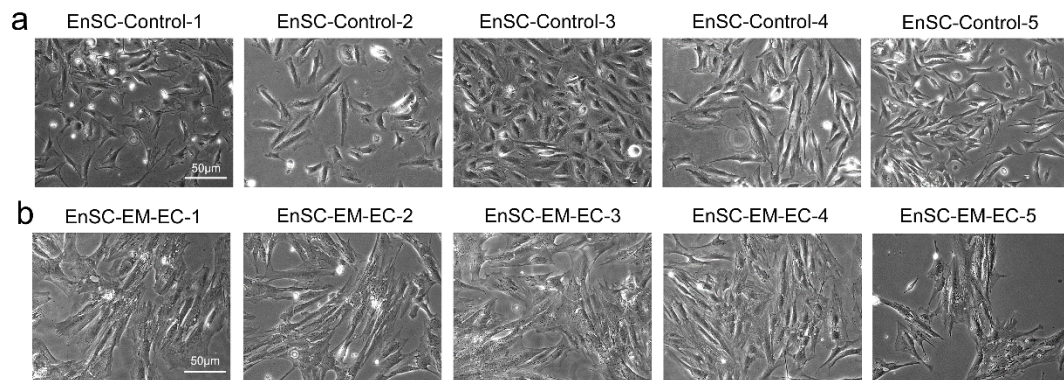

**Figure S1. Morphology of P3 EnSCs-Control and EnSC-EM-EC.** EnSC-EM-EC isolated from independent patient (n = 5) were consistent and showed similar morphology, which display a more “aggressive” phenotype.

Supplemental Figure S2. Liu et al.

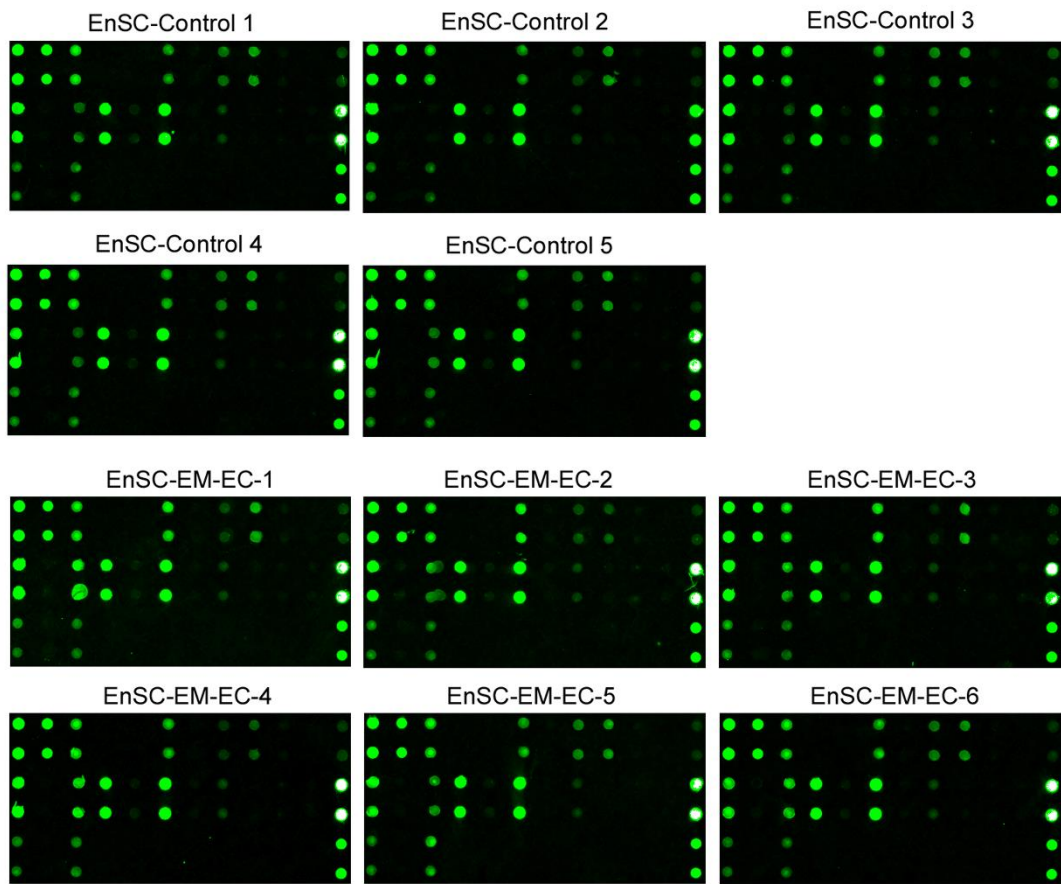

**Figure S2. Paracrine production of biological factors in the CM of EnSCs.** The array images of EnSCs-Control (n = 5) and EnSC-EM-EC (n = 6) were shown.

Supplemental Figure S3. Liu et al.

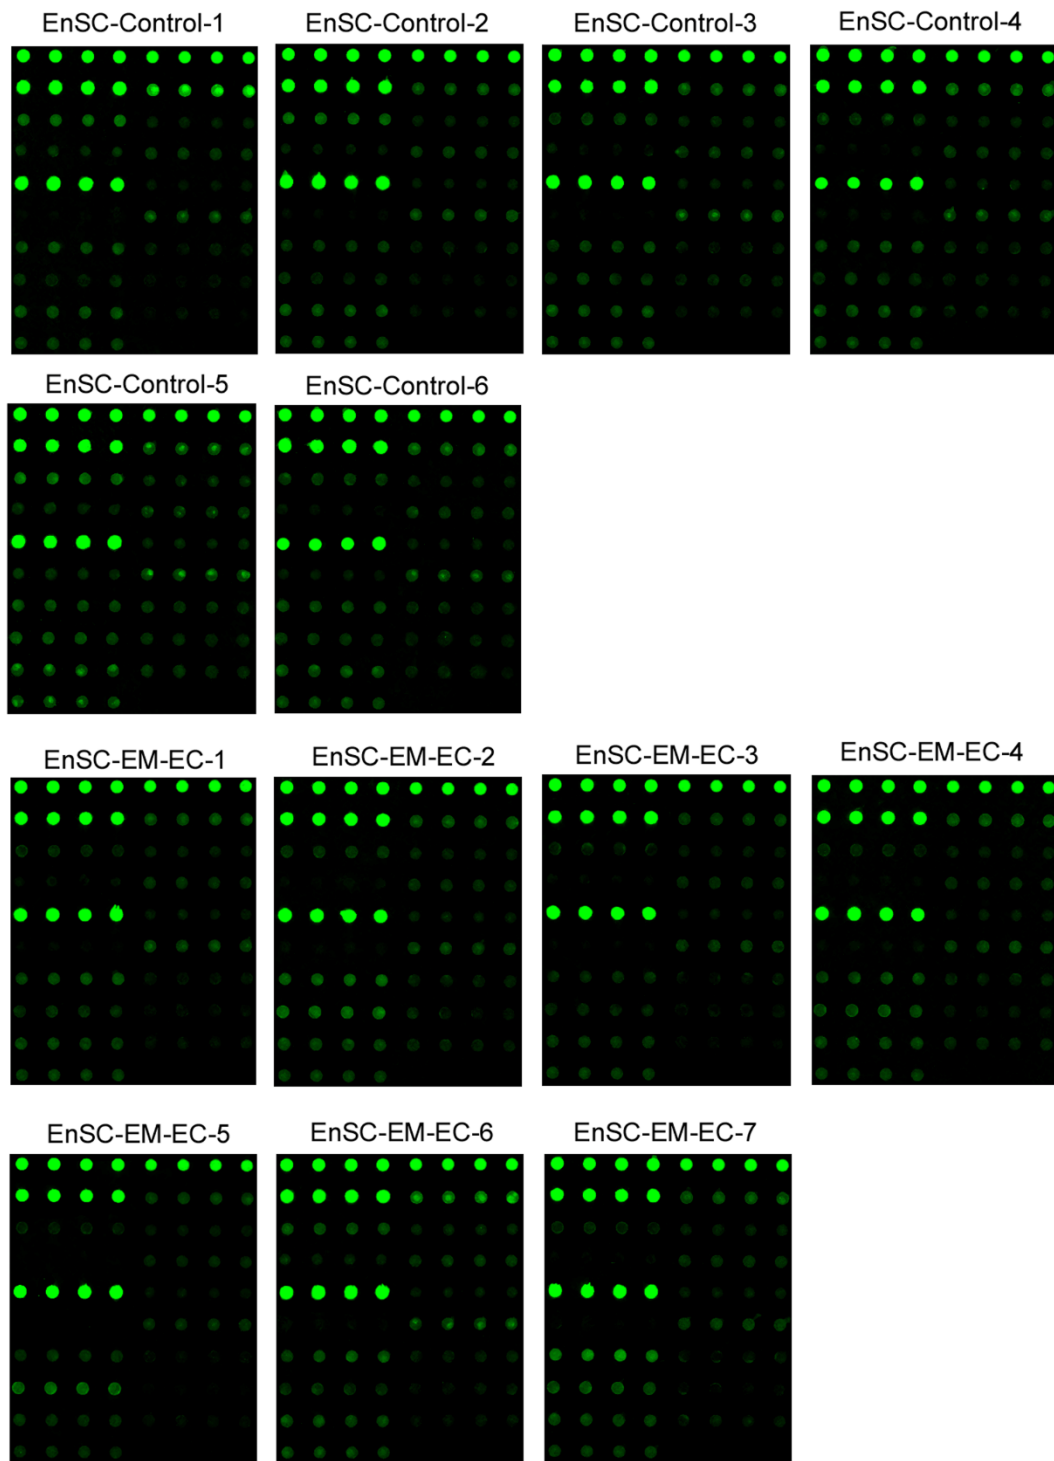

**Figure S3. Expression of adhesion molecules on EnSCs.** The array images of EnSCs-Control (n = 6) and EnSC-EM-EC (n = 7) were shown.

## Supplemental Figure S4. Liu et al.

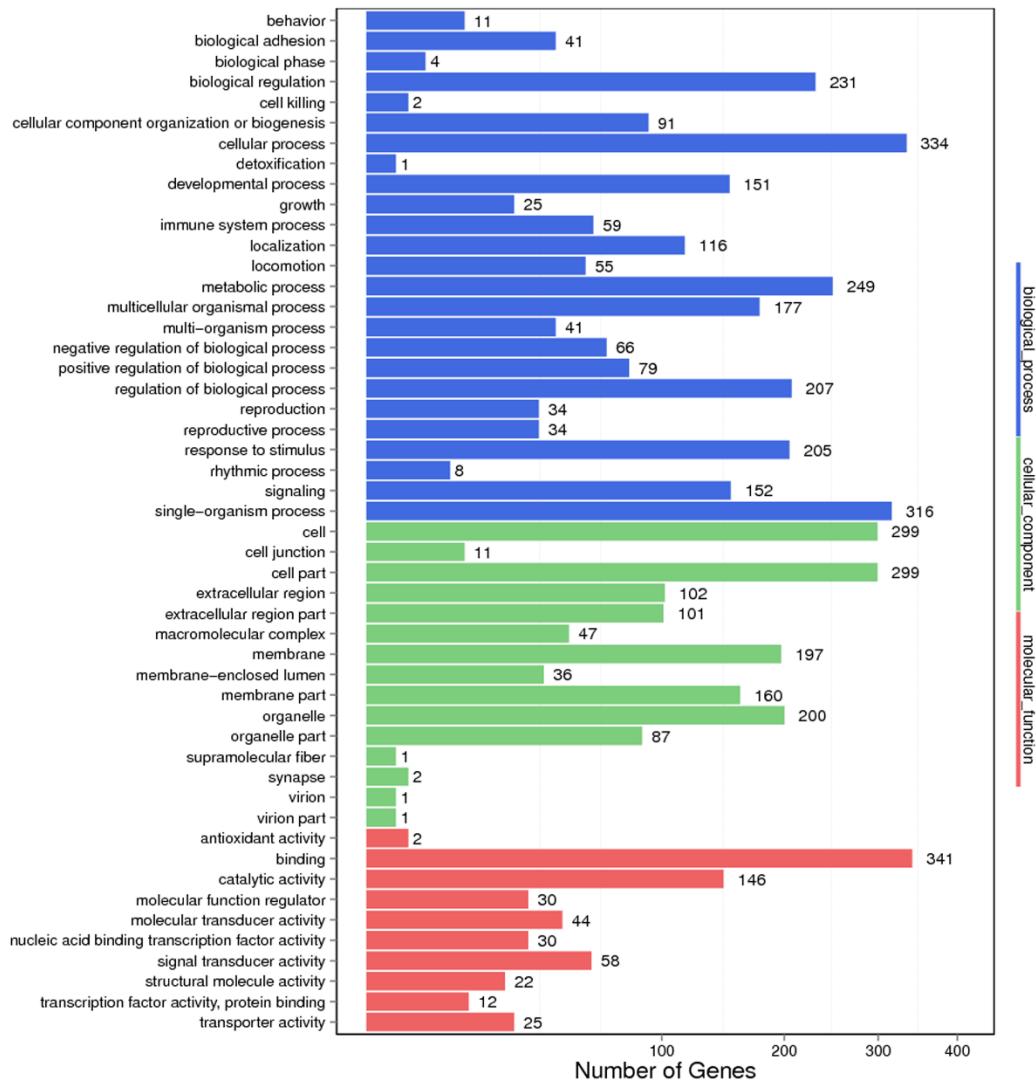

**Figure S4. GO functional classification on DEGs between EnSC-Control and EnSC-EM-EC.** X axis means number of DEGs (the number is presented by its square root value); Y axis represents GO terms. All GO terms are grouped into three ontologies: blue is for biological process; brown is for cellular component and orange is for molecular function.

## Supplemental Figure S5. Liu et al.

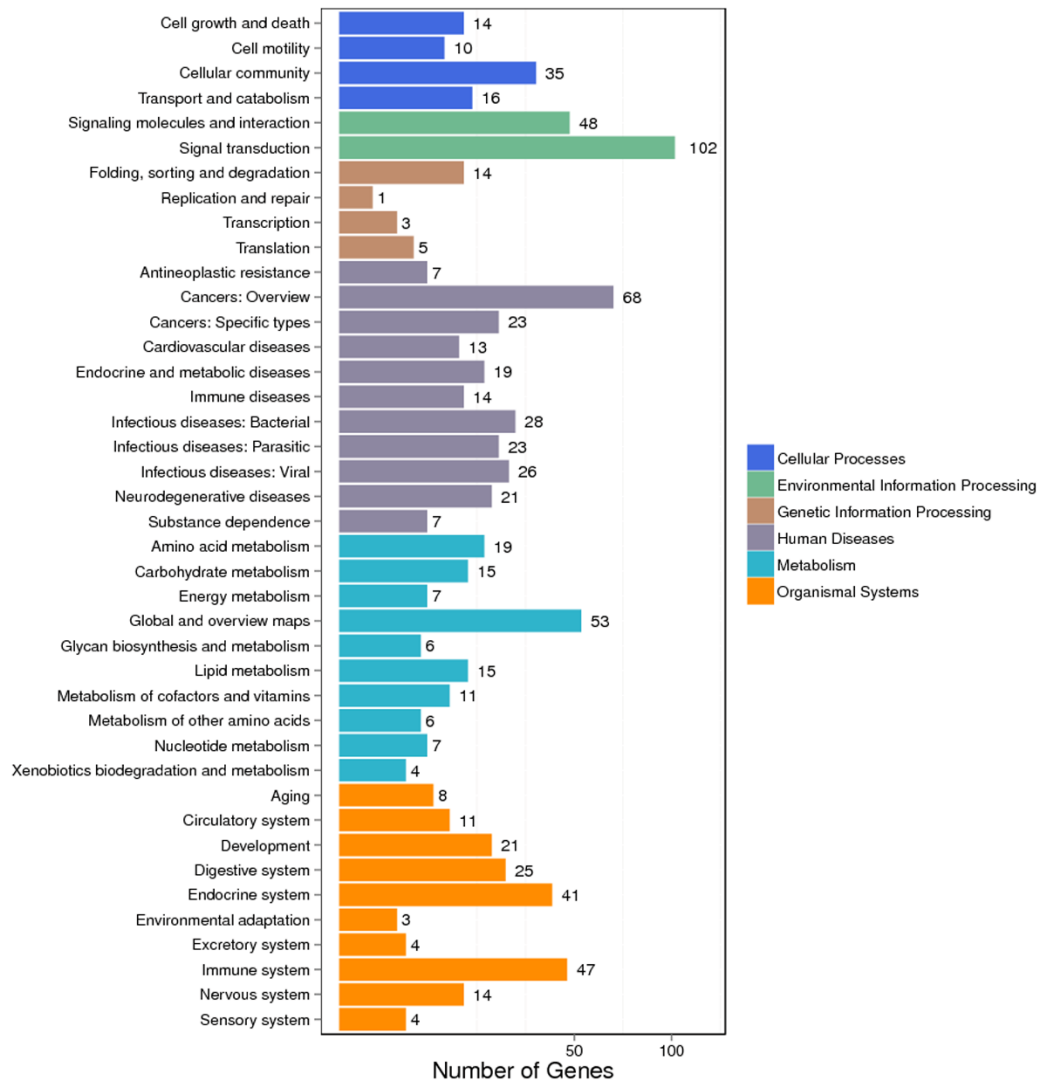

**Figure S5. KEGG classification on DEGs between EnSC-Control and EnSC-EM-EC.** X axis means number of DEGs; Y axis represents second KEGG pathway terms. All second pathway terms are grouped in top pathway terms indicated in different color.

## METHODS

**Isolation and Culture of human umbilical cord venous endothelial cells (HUVECs).** HUVECs isolation was performed as described before. Briefly, human umbilical cord (20 cm) was rinsed by PBS with P/S in sterile conditions, tidily cut both ends of the cord with a scalpel, cannulated at both ends with sterile needles and tightly maintain them with string. Subsequently, PBS with P/S was introduced into umbilical vein through the needles fixed at the end of umbilical cord, in order to completely wash the red blood cells and blood clots away. Next, after incubation with 0.2% collagenase solution (Sigma-Aldrich) in 37°C water-bath for 10 min, the umbilical vein was gently squeezed to facilitate cell detachment. Then, the umbilical vein was fulfilled with complete ECM medium, and the cell suspension was collected into a sterile tube, centrifuged for 10 min at 750 g. Finally, the pellet of cells were gently resuspended in complete ECM medium and seeded into cell culture flasks previously treated with fibronectin solution (Sigma-Aldrich) at 37°C with 5% humidified CO<sub>2</sub>. After reaching confluence (P0), the cells were detached by 0.25% trypsin/1 mM EDTA and subcultured to new flasks by the ratio of 1: 3, and P3 HUVECs were used for the further tests.

Supplemental Figure S6. Liu et al.

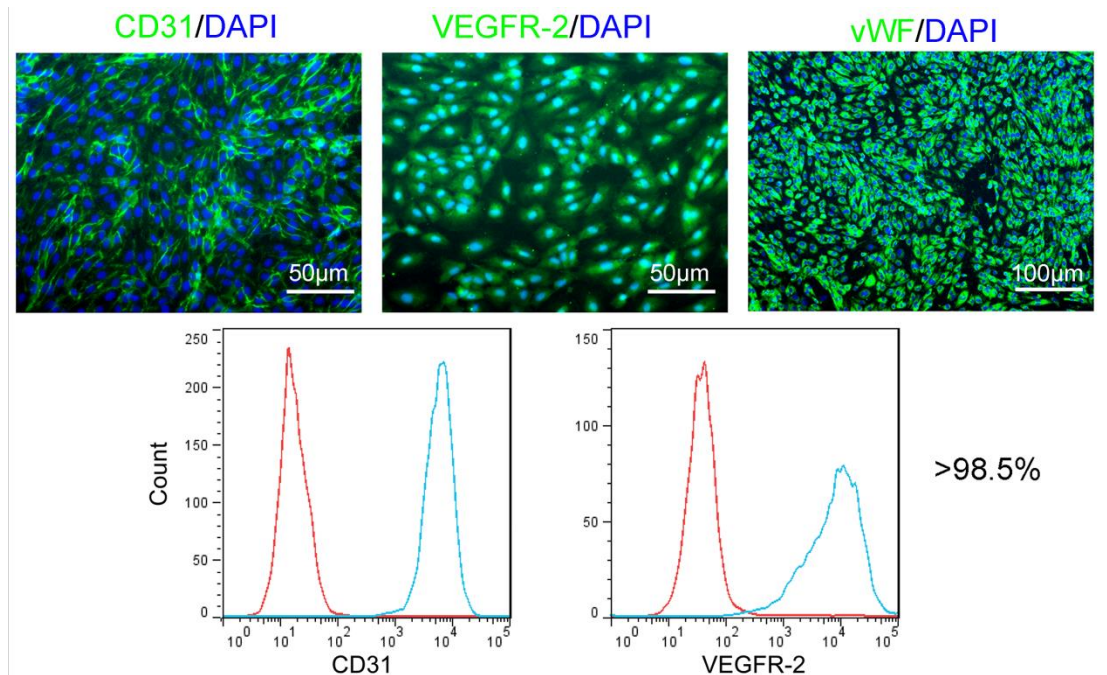

**Fig S6. Identification of HUVECs.** The HUVECs used in tube formation assay positively expressed typical endothelial markers, including CD31, VEGFR2 and vWF, and the positive ratio exceeded 95%, which fulfill the standard of endothelial cells.



## Supplemental Figure S7. Liu et al.

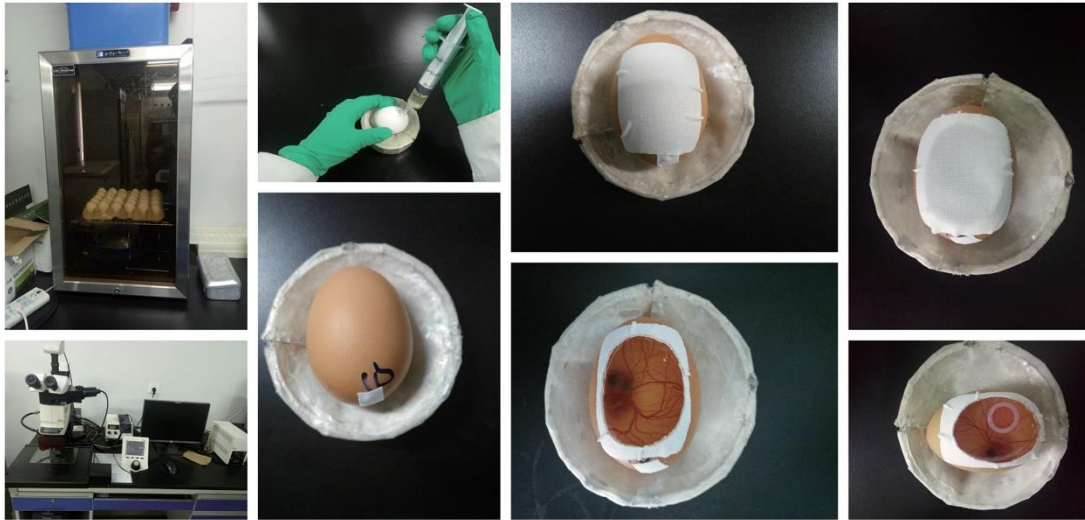

**Fig S7** The schematic diagram of CAM assay used in this study with minor improvement. the fertilized chicken eggs were incubated at 38.2 °C with approximately 55-65% humidity under sterile conditions. On day 3, the shallow notch was made on the shell with saw blade, and 3 to 5 ml of albumen were removed by sterilized syringe to allow detachment of the developing CAM from the shell. Subsequently, the small hole was sealed with tape, and the eggs were returned to the incubator with the fixed position. On day 7, an opening window was made by scissor on the shell, and a sterilized silicone loop with diameter of 10 mm was placed on top of the growing CAM between mature blood vessels.

**Table S1 Details of antibodies used**

| <b>Antibodies</b>                                                       | <b>Manufacturer</b> | <b>Catalog No</b> | <b>Test</b> | <b>Concentration used</b>    |
|-------------------------------------------------------------------------|---------------------|-------------------|-------------|------------------------------|
| Anti-human monoclonal rabbit Vimentin                                   | Abcam               | ab92547           | IF          | 1: 300                       |
| FITC conjugated anti-human monoclonal mouse CD29                        | eBioscience         | 11-0299-42        | FC          | 1: 20                        |
| FITC conjugated anti-human monoclonal mouse CD73                        | eBioscience         | 11-0739-41        | FC          | 1: 20                        |
| FITC conjugated anti-human monoclonal mouse CD90                        | eBioscience         | 11-0909-41        | FC          | 1: 20                        |
| PE conjugated anti-human monoclonal mouse CD105                         | eBioscience         | 12-1057-41        | FC          | 1: 20                        |
| FITC conjugated anti-human monoclonal mouse CD34                        | eBioscience         | 11-0349-42        | FC          | 1: 20                        |
| FITC conjugated anti-human monoclonal mouse CD45                        | eBioscience         | 11-9459-42        | FC          | 1: 20                        |
| FITC conjugated anti-human monoclonal mouse HLA-ABC                     | eBioscience         | 11-9983-42        | FC          | 1: 20                        |
| FITC conjugated anti-human monoclonal mouse HLA-DR                      | eBioscience         | 11-9956-42        | FC          | 1: 20                        |
| FITC/PE conjugated monoclonal mouse IgG1/IgG2a isotype control cocktail | Invitrogen          | PA5-33181         | FC          | 1: 20                        |
| Anti-human monoclonal mouse CD31                                        | Abcam               | ab9498            | IF/FC       | 1: 300 for IF; 1: 100 for FC |
| Anti-human monoclonal mouse VEGFR2                                      | Abcam               | ab9530            | IF/FC       | 1: 300 for IF; 1: 100 for FC |
| Anti-human polyclonal rabbit vWF                                        | Abcam               | ab6994            | IF          | 1: 300                       |
| Anti-human polyclonal rabbit Fibronectin                                | Abcam               | ab2413            | IF          | 1: 300                       |
| Alexa Fluor 488 conjugated goat anti-rabbit IgG secondary antibody,     | Invitrogen          | A27034            | IF          | 1:1000                       |
| Alexa Fluor 488 conjugated goat anti-mouse IgG secondary antibody       | Invitrogen          | A28175            | IF/FC       | 1:1000 for IF; 1: 250 for FC |
| GAPDH (D16H11) XP <sup>®</sup> Rabbit mAb                               | CST                 | #5174             | WB          | 1:1000                       |
| Akt (pan) (C67E7) Rabbit mAb                                            | CST                 | #4691             | WB          | 1:1000                       |

|                                                                         |        |        |    |        |
|-------------------------------------------------------------------------|--------|--------|----|--------|
| Phospho-Akt (Ser473) (D9E) XP® Rabbit mAb                               | CST    | #4060  | WB | 1:1000 |
| SAPK/JNK Antibody                                                       | CST    | #9252  | WB | 1:1000 |
| Phospho-p44/42 MAPK (Erk1/2) (Thr202/Tyr204) (D13.14.4E) XP® Rabbit mAb | CST    | #4370  | WB | 1:1000 |
| HRP Conjugate Goat Anti-Rabbit IgG (H+L), Secondary Antibody            | BOSTER | BA1055 | WB | 1:5000 |

**Table S2 The DEGs between EnSC-Control and EnSC-EM-EC**

| GeneID | geneLength | Means-EnSC-Control | Means-EnSC-EM-EC | log2Ratio(EnSC-EM-EC/EnSC-Control) | Up-Down-Regulation(EnSC-EM-EC/EnSC-Control) | Probability | Symbol   |
|--------|------------|--------------------|------------------|------------------------------------|---------------------------------------------|-------------|----------|
| 4879   | 708        | 4.166              | 887.1166667      | 7.734317199                        | Up                                          | 0.997999768 | NPPB     |
| 5740   | 5603       | 2.22               | 224.9166667      | 6.662687084                        | Up                                          | 0.992372665 | PTGIS    |
| 2202   | 3060.04    | 2.876              | 223.9666667      | 6.283076544                        | Up                                          | 0.991214758 | EFEMP1   |
| 6424   | 2974       | 0.406              | 84.345           | 7.69867901                         | Up                                          | 0.985369532 | SFRP4    |
| 4319   | 1777       | 375.78             | 13.81333333      | -4.765754877                       | Down                                        | 0.982749739 | MMP10    |
| 4314   | 1906       | 1474.346           | 60.70666667      | -4.602076367                       | Down                                        | 0.982701009 | MMP3     |
| 4345   | 2318.45    | 1.422              | 82.12833333      | 5.851886651                        | Up                                          | 0.980071934 | CD200    |
| 27295  | 2709.57    | 0.244              | 58.54            | 7.906397788                        | Up                                          | 0.979828286 | PDLIM3   |
| 9220   | 2110       | 52.6               | 0.153333333      | -8.422247629                       | Down                                        | 0.978043857 | TIAF1    |
| 8828   | 5686.93    | 6.318              | 155.9666667      | 4.625625981                        | Up                                          | 0.976059868 | NRP2     |
| 5270   | 2256.44    | 34.126             | 626.3483333      | 4.198021984                        | Up                                          | 0.974985497 | SERPINE2 |
| 7045   | 2805       | 93.134             | 1656.055         | 4.152298835                        | Up                                          | 0.974502843 | TGFBI    |
| 4256   | 1398       | 339.746            | 18.53333333      | -4.196262278                       | Down                                        | 0.973567699 | MGP      |
| 1469   | 782        | 68.946             | 2.15             | -5.003058289                       | Down                                        | 0.971251885 | CST1     |
| 8076   | 2945.51    | 1.62               | 59.32            | 5.19445288                         | Up                                          | 0.970288897 | MFAP5    |
| 23231  | 4411.84    | 1.074              | 49.25666667      | 5.519253102                        | Up                                          | 0.969121708 | SEL1L3   |
| 28984  | 1126       | 208.686            | 12.88833333      | -4.017196201                       | Down                                        | 0.967518274 | RGCC     |
| 27129  | 2908       | 5.474              | 105.9666667      | 4.274871271                        | Up                                          | 0.966738601 | HSPB7    |
| 56925  | 1132       | 6.6                | 118.3916667      | 4.164957702                        | Up                                          | 0.965176935 | LXN      |
| 2627   | 3785       | 0.612              | 37.29            | 5.929113334                        | Up                                          | 0.964053835 | GATA6    |
| 5806   | 1955       | 0.544              | 35.69166667      | 6.03583681                         | Up                                          | 0.963246316 | PTX3     |
| 6275   | 523.13     | 217.912            | 15.84666667      | -3.781494337                       | Down                                        | 0.961566307 | S100A4   |
| 1589   | 2041       | 58.994             | 2.835            | -4.379147592                       | Down                                        | 0.959512704 | CYP21A2  |
| 11346  | 5390.18    | 6.71               | 100.9383333      | 3.911017594                        | Up                                          | 0.959085741 | SYNPO    |
| 2335   | 8529.21    | 248.834            | 2728.853333      | 3.455039327                        | Up                                          | 0.958874579 | FN1      |
| 5972   | 1493       | 60.876             | 3.385            | -4.168645827                       | Down                                        | 0.957032138 | REN      |
| 3481   | 4593.25    | 479.276            | 45.04666667      | -3.411364439                       | Down                                        | 0.954064277 | IGF2     |

|        |         |         |             |              |      |             |          |
|--------|---------|---------|-------------|--------------|------|-------------|----------|
| 56971  | 2262    | 60.974  | 4.02        | -3.922926786 | Down | 0.951572108 | CEACAM19 |
| 158471 | 8318.15 | 0.35    | 25.77666667 | 6.20256698   | Up   | 0.951551224 | PRUNE2   |
| 54541  | 1752    | 7.502   | 93.42333333 | 3.638435753  | Up   | 0.950701938 | DDIT4    |
| 58189  | 1472    | 30.948  | 0.99        | -4.966273844 | Down | 0.95056271  | WFDC1    |
| 5142   | 3884.02 | 41.316  | 2.113333333 | -4.289108342 | Down | 0.949801601 | PDE4B    |
| 84293  | 1713.26 | 113.876 | 9.86        | -3.529732266 | Down | 0.949683258 | FAM213A  |
| 4015   | 5330    | 67.224  | 627.24      | 3.221969271  | Up   | 0.948717949 | LOX      |
| 205    | 6890.42 | 0.482   | 24.87666667 | 5.689616229  | Up   | 0.947367444 | AK4      |
| 2167   | 838     | 21.966  | 0.165       | -7.056662345 | Down | 0.946346444 | FABP4    |
| 1803   | 3913    | 2.84    | 41.96166667 | 3.885109146  | Up   | 0.941053486 | DPP4     |
| 90865  | 2561.33 | 0.064   | 19.39666667 | 8.243521125  | Up   | 0.940828402 | IL33     |
| 10763  | 5591    | 45.552  | 3.441666667 | -3.726335117 | Down | 0.940215802 | NES      |
| 7148   | 8349.36 | 115.106 | 12.19666667 | -3.238404217 | Down | 0.939979116 | TNXB     |
| 25890  | 4488    | 1.09    | 26.14166667 | 4.583951083  | Up   | 0.939009166 | ABI3BP   |
| 6281   | 1069    | 29.962  | 243.9866667 | 3.025596476  | Up   | 0.938869939 | S100A10  |
| 768    | 1561    | 0.206   | 19.18666667 | 6.541315944  | Up   | 0.937419654 | CA9      |
| 9518   | 1417    | 150.764 | 17.30833333 | -3.122753262 | Down | 0.937338438 | GDF15    |
| 5010   | 2742.81 | 16.562  | 142.5383333 | 3.105401155  | Up   | 0.936612136 | CLDN11   |
| 72     | 1344.28 | 59.948  | 465.035     | 2.955555774  | Up   | 0.93657965  | ACTG2    |
| 9358   | 2620.41 | 1.22    | 26.395      | 4.435311613  | Up   | 0.936500754 | ITGBL1   |
| 1809   | 5208.96 | 20.528  | 166.1566667 | 3.016879198  | Up   | 0.936036663 | DPYSL3   |
| 4502   | 466     | 185     | 1345.931667 | 2.86300799   | Up   | 0.935554009 | MT2A     |
| 684    | 1048    | 5.86    | 58.815      | 3.327211573  | Up   | 0.934454113 | BST2     |
| 10417  | 1885.67 | 531.352 | 75.235      | -2.820192029 | Down | 0.933428472 | SPON2    |
| 9244   | 1824    | 0.132   | 17.53833333 | 7.053829915  | Up   | 0.933126813 | CRLF1    |
| 1734   | 6148    | 23.308  | 0.995       | -4.54998488  | Down | 0.932565263 | DIO2     |
| 56901  | 1275    | 0.712   | 21.095      | 4.888880036  | Up   | 0.931869126 | NDUFA4L2 |
| 3485   | 1234.25 | 20.672  | 162.4983333 | 2.974675041  | Up   | 0.931456085 | IGFBP2   |
| 114769 | 753.95  | 90.34   | 10.82       | -3.061664415 | Down | 0.930616081 | CARD16   |
| 140862 | 2610    | 17.02   | 0.148333333 | -6.842244391 | Down | 0.930592876 | ISM1     |
| 639    | 4753    | 47.46   | 4.536666667 | -3.387007534 | Down | 0.930553428 | PRDM1    |
| 4316   | 1153    | 19.176  | 0.508333333 | -5.237383167 | Down | 0.92989906  | MMP7     |

|        |         |         |             |              |      |             |          |
|--------|---------|---------|-------------|--------------|------|-------------|----------|
| 1311   | 2471    | 0.03    | 15.99833333 | 9.0587434    | Up   | 0.929077619 | COMP     |
| 3207   | 2653    | 44.116  | 4.418333333 | -3.319727818 | Down | 0.927481146 | HOXA11   |
| 10267  | 920     | 53.296  | 5.755       | -3.211139426 | Down | 0.927418494 | RAMP1    |
| 6035   | 833.66  | 0.032   | 15.46       | 8.916252699  | Up   | 0.926578489 | RNASE1   |
| 1009   | 6819.63 | 13.33   | 102.9683333 | 2.949452037  | Up   | 0.92653208  | CDH11    |
| 2331   | 3271    | 5.2     | 49.50833333 | 3.251087854  | Up   | 0.926293073 | FMOD     |
| 151887 | 4674.93 | 47.74   | 322.27      | 2.754999423  | Up   | 0.926211858 | CCDC80   |
| 1294   | 9169    | 46.41   | 4.775       | -3.280863059 | Down | 0.925348648 | COL7A1   |
| 84624  | 6578    | 0.32    | 16.8        | 5.714245518  | Up   | 0.925130526 | FNDC1    |
| 2626   | 3130.47 | 0.142   | 15.345      | 6.755733906  | Up   | 0.923327532 | GATA4    |
| 2624   | 3263    | 52.192  | 5.936666667 | -3.136103671 | Down | 0.922561782 | GATA2    |
| 91461  | 2517    | 1.248   | 22.13833333 | 4.148856775  | Up   | 0.922148741 | PKDCC    |
| 144347 | 2160    | 0.6     | 17.92333333 | 4.90073266   | Up   | 0.922113934 | RFLNA    |
| 5328   | 2398    | 182.29  | 27.65833333 | -2.720449292 | Down | 0.921849402 | PLAU     |
| 80303  | 1868.75 | 30.778  | 2.69        | -3.516221408 | Down | 0.921352825 | EFHD1    |
| 2516   | 3095    | 0.01    | 14.19833333 | 10.47150587  | Up   | 0.920607959 | NR5A1    |
| 6352   | 1237    | 79.84   | 11.16166667 | -2.838559253 | Down | 0.92015083  | CCL5     |
| 5352   | 4071.38 | 26.21   | 168.345     | 2.683231614  | Up   | 0.91984453  | PLOD2    |
| 1301   | 7290.95 | 0.206   | 15.01       | 6.187135829  | Up   | 0.919800441 | COL11A1  |
| 9351   | 2092.22 | 150.14  | 23.03333333 | -2.704513273 | Down | 0.919721545 | SLC9A3R2 |
| 5999   | 3223.7  | 6.456   | 51.91833333 | 3.007531587  | Up   | 0.919561434 | RGS4     |
| 1439   | 4848    | 62.384  | 8.021666667 | -2.959202137 | Down | 0.919125189 | CSF2RB   |
| 2621   | 2551    | 35.48   | 214.9616667 | 2.599001497  | Up   | 0.919078779 | GAS6     |
| 123    | 2029    | 34.808  | 209.6066667 | 2.590193776  | Up   | 0.918670379 | PLIN2    |
| 51339  | 3798.75 | 1.288   | 21.49833333 | 4.06102032   | Up   | 0.918505627 | DACT1    |
| 1E+08  | 3887    | 142.392 | 22.29       | -2.675399572 | Down | 0.918410488 | HOTS     |
| 3223   | 1869.04 | 0.688   | 17.62333333 | 4.678934451  | Up   | 0.918294466 | HOXC6    |
| 6387   | 2221.38 | 66.816  | 9.103333333 | -2.875726804 | Down | 0.918194686 | CXCL12   |
| 4312   | 1903    | 108.228 | 16.31666667 | -2.729655527 | Down | 0.917234018 | MMP1     |
| 4320   | 2306    | 46.398  | 5.695       | -3.026294872 | Down | 0.917185288 | MMP11    |
| 59     | 1418.99 | 441.24  | 2530.181667 | 2.519605486  | Up   | 0.916493793 | ACTA2    |
| 5318   | 4390.25 | 0.294   | 14.75       | 5.648754989  | Up   | 0.915570252 | PKP2     |

|        |         |         |             |              |      |             |          |
|--------|---------|---------|-------------|--------------|------|-------------|----------|
| 644150 | 4195    | 2.088   | 25.21833333 | 3.594279315  | Up   | 0.915486715 | WIPF3    |
| 10840  | 3003    | 14.294  | 0.211666667 | -6.077471792 | Down | 0.915444947 | ALDH1L1  |
| 1674   | 2268    | 7.674   | 56.75666667 | 2.886739192  | Up   | 0.915403179 | DES      |
| 400916 | 718     | 107.36  | 16.85666667 | -2.671065394 | Down | 0.915157211 | CHCHD10  |
| 7052   | 5026.22 | 442.378 | 76.58166667 | -2.530208677 | Down | 0.914922845 | TGM2     |
| 6347   | 760     | 20.42   | 124.3333333 | 2.606158358  | Up   | 0.914911243 | CCL2     |
| 79627  | 8875.22 | 97.672  | 15.19833333 | -2.684031914 | Down | 0.914358974 | OGFRL1   |
| 347735 | 2428.97 | 86.98   | 13.59333333 | -2.677784434 | Down | 0.912716092 | SERINC2  |
| 1475   | 838     | 0.158   | 13.54833333 | 6.422047019  | Up   | 0.912611672 | CSTA     |
| 3294   | 1451    | 13.702  | 0.2         | -6.09824268  | Down | 0.912147581 | HSD17B2  |
| 7378   | 1503.58 | 31.286  | 3.315       | -3.238436442 | Down | 0.911961945 | UPP1     |
| 7076   | 931     | 480.896 | 2544.731667 | 2.403716706  | Up   | 0.911760065 | TIMP1    |
| 216    | 2378    | 71.872  | 10.845      | -2.72839978  | Down | 0.911384151 | ALDH1A1  |
| 7022   | 2895    | 27.174  | 2.628333333 | -3.370006786 | Down | 0.911235642 | TFAP2C   |
| 57580  | 6633    | 36.102  | 4.295       | -3.071348726 | Down | 0.910590556 | PREX1    |
| 84561  | 3449    | 2.506   | 26.43833333 | 3.399172913  | Up   | 0.910548788 | SLC12A8  |
| 5669   | 1985    | 44.938  | 5.938333333 | -2.919805935 | Down | 0.910360831 | PSG1     |
| 5648   | 3893.12 | 82.686  | 13.54833333 | -2.609527692 | Down | 0.909780717 | MASP1    |
| 1E+08  | 2401.25 | 70.874  | 10.98       | -2.69037842  | Down | 0.909741269 | CD24     |
| 4232   | 2442.71 | 227.05  | 40.855      | -2.47442548  | Down | 0.909683258 | MEST     |
| 4803   | 1052    | 0.472   | 14.70666667 | 4.96153962   | Up   | 0.909277178 | NGF      |
| 7869   | 2916.78 | 58.126  | 8.461666667 | -2.780169872 | Down | 0.909096183 | SEMA3B   |
| 11142  | 1199.27 | 259.312 | 48.11666667 | -2.430080363 | Down | 0.908903585 | PKIG     |
| 7058   | 5898    | 28.874  | 164.1166667 | 2.50687887   | Up   | 0.908850215 | THBS2    |
| 92949  | 7858    | 0.134   | 12.85166667 | 6.583578656  | Up   | 0.908748115 | ADAMTSL1 |
| 3885   | 1713    | 69.046  | 11.05166667 | -2.643293884 | Down | 0.907750319 | KRT34    |
| 9510   | 4670    | 207.772 | 38.58       | -2.429076197 | Down | 0.907529876 | ADAMTS1  |
| 54757  | 4305.1  | 1.052   | 17.85166667 | 4.084852164  | Up   | 0.907404571 | FAM20A   |
| 64866  | 6027    | 6.182   | 43.93166667 | 2.829115674  | Up   | 0.907274626 | CDCP1    |
| 2151   | 3446    | 42.402  | 5.845       | -2.858857385 | Down | 0.907086669 | F2RL2    |
| 4493   | 519     | 11.774  | 70.81       | 2.588348584  | Up   | 0.906622578 | MT1E     |
| 23114  | 9767.03 | 1.664   | 20.82666667 | 3.645704614  | Up   | 0.906246664 | NFASC    |

|        |         |         |             |              |      |             |         |
|--------|---------|---------|-------------|--------------|------|-------------|---------|
| 176    | 8840    | 0.286   | 13.15166667 | 5.523086682  | Up   | 0.905395057 | ACAN    |
| 5350   | 3021    | 1.316   | 18.74833333 | 3.832530956  | Up   | 0.905292957 | PLN     |
| 6376   | 3217    | 13.162  | 0.291666667 | -5.495914401 | Down | 0.905211742 | CX3CL1  |
| 5798   | 3634.15 | 1.862   | 21.685      | 3.541772465  | Up   | 0.905067873 | PTPRN   |
| 794    | 1469.92 | 0.962   | 16.67666667 | 4.115650247  | Up   | 0.904401903 | CALB2   |
| 6372   | 1677    | 0.37    | 13.46166667 | 5.185187958  | Up   | 0.904353173 | CXCL6   |
| 11096  | 9680    | 31.228  | 3.838333333 | -3.024288264 | Down | 0.904260355 | ADAMTS5 |
| 3732   | 1667.05 | 86.504  | 14.65833333 | -2.561045768 | Down | 0.903603666 | CD82    |
| 335    | 1035.7  | 0.11    | 12.03       | 6.772989309  | Up   | 0.903510848 | APOA1   |
| 79887  | 1951    | 28.894  | 3.385       | -3.093542201 | Down | 0.902615153 | PLBD1   |
| 1152   | 1475    | 56.586  | 9.431666667 | -2.584860522 | Down | 0.902190509 | CKB     |
| 3236   | 1814    | 27.992  | 3.198333333 | -3.129622359 | Down | 0.902123216 | HOXD10  |
| 2537   | 837.14  | 105.76  | 19.47166667 | -2.441345801 | Down | 0.901721777 | IFI6    |
| 4052   | 5647.68 | 3.08    | 27.31       | 3.148427058  | Up   | 0.901441002 | LTBP1   |
| 1545   | 5160    | 8.826   | 53.66666667 | 2.60419463   | Up   | 0.901278571 | CYP1B1  |
| 629    | 2646    | 1.162   | 17.33833333 | 3.899283251  | Up   | 0.900904977 | CFB     |
| 2199   | 4200.11 | 12.062  | 71.15833333 | 2.56056358   | Up   | 0.900436246 | FBLN2   |
| 3237   | 1463    | 28.35   | 3.468333333 | -3.031034271 | Down | 0.90040608  | HOXD11  |
| 3037   | 3275    | 1.542   | 18.98166667 | 3.621732002  | Up   | 0.90030398  | HAS2    |
| 664    | 1661    | 27.362  | 137.4233333 | 2.328381391  | Up   | 0.900243648 | BNIP3   |
| 10085  | 4751.81 | 13.064  | 75.09       | 2.523024096  | Up   | 0.900025525 | EDIL3   |
| 64968  | 1017    | 115.654 | 22.33       | -2.372760007 | Down | 0.89994895  | MRPS6   |
| 3486   | 2620.11 | 189.07  | 906.5183333 | 2.26141573   | Up   | 0.8986727   | IGFBP3  |
| 8622   | 4345    | 15.776  | 0.958333333 | -4.041060096 | Down | 0.898556677 | PDE8B   |
| 4784   | 5570.45 | 17.554  | 92.65       | 2.399991164  | Up   | 0.898364079 | NFIX    |
| 6423   | 2005    | 0.052   | 11.03       | 7.728705452  | Up   | 0.897677225 | SFRP2   |
| 9537   | 3345.26 | 56.282  | 279.2933333 | 2.311035636  | Up   | 0.897644738 | TP53I11 |
| 2825   | 2168.01 | 1.384   | 17.88333333 | 3.691699822  | Up   | 0.897370925 | GPR1    |
| 283208 | 2299    | 1.028   | 15.95166667 | 3.955794998  | Up   | 0.897333797 | P4HA3   |
| 5155   | 2997.06 | 29.894  | 3.883333333 | -2.944488497 | Down | 0.897201532 | PDGFB   |
| 5236   | 2483.26 | 15.778  | 83.65666667 | 2.406566172  | Up   | 0.897115675 | PGM1    |
| 64220  | 2752.81 | 25.634  | 3.011666667 | -3.089424613 | Down | 0.897029818 | STRA6   |



|        |         |         |             |              |      |             |          |
|--------|---------|---------|-------------|--------------|------|-------------|----------|
| 56265  | 2409    | 38.834  | 5.911666667 | -2.715683487 | Down | 0.896521638 | CPXM1    |
| 23475  | 2174.64 | 35.996  | 5.226666667 | -2.783873539 | Down | 0.895848706 | QPRT     |
| 7993   | 1437.5  | 3.838   | 29.14166667 | 2.924656774  | Up   | 0.895540086 | UBXN8    |
| 3224   | 2290    | 0.546   | 13.16       | 4.591114728  | Up   | 0.895419422 | HOXC8    |
| 10082  | 7114    | 1.398   | 17.40333333 | 3.637927392  | Up   | 0.894939088 | GPC6     |
| 1634   | 4270.08 | 10.754  | 59.695      | 2.472736721  | Up   | 0.893899524 | DCN      |
| 51477  | 2351.09 | 68.174  | 12.855      | -2.406892023 | Down | 0.893751015 | ISYNA1   |
| 5918   | 1459.74 | 0.596   | 13.20666667 | 4.469810239  | Up   | 0.893614108 | RARRES1  |
| 220    | 3622    | 6.348   | 39.11666667 | 2.623409403  | Up   | 0.893303167 | ALDH1A3  |
| 23245  | 3344.8  | 56.386  | 10.08166667 | -2.483602842 | Down | 0.892936536 | ASTN2    |
| 5054   | 3207    | 449.416 | 1929.221667 | 2.101895525  | Up   | 0.890804038 | SERPINE1 |
| 63898  | 3272.81 | 4.43    | 30.82333333 | 2.798644284  | Up   | 0.890474533 | SH2D4A   |
| 56892  | 1841    | 25.336  | 3.261666667 | -2.957507517 | Down | 0.890212322 | C8orf4   |
| 7436   | 5230    | 3.464   | 26.05833333 | 2.911233978  | Up   | 0.890070774 | VLDLR    |
| 10157  | 5887    | 23.168  | 2.898333333 | -2.998838076 | Down | 0.889906022 | AASS     |
| 643314 | 6979    | 3.664   | 26.68833333 | 2.864717805  | Up   | 0.889736628 | KIAA0754 |
| 5307   | 2383    | 21.57   | 2.431666667 | -3.149008794 | Down | 0.889274858 | PITX1    |
| 57493  | 9156    | 51.798  | 232.085     | 2.163684983  | Up   | 0.889103144 | HEG1     |
| 3280   | 1475    | 107.472 | 22.13666667 | -2.279450936 | Down | 0.888636733 | HES1     |
| 3162   | 1606    | 8.29    | 46.665      | 2.492896889  | Up   | 0.888478942 | HMOX1    |
| 55194  | 1004.21 | 169.972 | 37.8        | -2.168838967 | Down | 0.887780485 | EVA1B    |
| 6770   | 2695    | 2.366   | 20.91166667 | 3.143786071  | Up   | 0.887402251 | STAR     |
| 1906   | 2112    | 21.302  | 2.498333333 | -3.091951006 | Down | 0.88729551  | EDN1     |
| 2114   | 3784    | 50.61   | 9.53        | -2.408874355 | Down | 0.887253742 | ETS2     |
| 5230   | 2439    | 84.09   | 354.4033333 | 2.075386023  | Up   | 0.886942801 | PGK1     |
| 3075   | 3976.6  | 2.726   | 21.81833333 | 3.000683434  | Up   | 0.886506555 | CFH      |
| 57451  | 9501.52 | 0.14    | 10.23       | 6.191235508  | Up   | 0.886404455 | TENM2    |
| 2308   | 5738    | 28.356  | 4.206666667 | -2.752904626 | Down | 0.885694396 | FOXO1    |
| 4811   | 5903    | 361.676 | 87.20666667 | -2.052187534 | Down | 0.885350969 | NID1     |
| 5032   | 1977    | 9.566   | 0.01        | -9.901771981 | Down | 0.884993619 | P2RY11   |
| 11343  | 4307.94 | 164.282 | 38.08666667 | -2.108816482 | Down | 0.883849635 | MGLL     |
| 4920   | 4099    | 0.568   | 11.97       | 4.397388412  | Up   | 0.883687203 | ROR2     |

|        |         |         |             |              |      |             |          |
|--------|---------|---------|-------------|--------------|------|-------------|----------|
| 718    | 5148    | 23.688  | 106.9716667 | 2.175000423  | Up   | 0.883550296 | C3       |
| 9435   | 4154    | 16.47   | 1.555       | -3.40485407  | Down | 0.882930734 | CHST2    |
| 6586   | 9727    | 1.146   | 14.67166667 | 3.678353818  | Up   | 0.882891287 | SLIT3    |
| 57124  | 2576    | 353.436 | 88.14333333 | -2.003525635 | Down | 0.882814712 | CD248    |
| 3357   | 2027.67 | 40.012  | 7.341666667 | -2.446253225 | Down | 0.882290289 | HTR2B    |
| 3908   | 9708    | 0.534   | 11.61166667 | 4.44259151   | Up   | 0.881299455 | LAMA2    |
| 27242  | 3646    | 76.164  | 16.255      | -2.228225692 | Down | 0.88117415  | TNFRSF21 |
| 5671   | 1922    | 11.164  | 0.46        | -4.601076358 | Down | 0.880853927 | PSG3     |
| 84206  | 3534    | 2.654   | 20.9        | 2.977262666  | Up   | 0.880213482 | MEX3B    |
| 668    | 2917    | 86.392  | 19.26333333 | -2.165040354 | Down | 0.880180995 | FOXL2    |
| 116496 | 6969    | 6.53    | 36.22333333 | 2.471764415  | Up   | 0.87989558  | FAM129A  |
| 220108 | 4808    | 35.296  | 6.283333333 | -2.489902673 | Down | 0.879751711 | FAM124A  |
| 2159   | 1558.92 | 35.938  | 6.501666667 | -2.466628625 | Down | 0.879600882 | F10      |
| 1612   | 5824.98 | 0.52    | 11.35666667 | 4.448884013  | Up   | 0.879313145 | DAPK1    |
| 4629   | 6882    | 1.796   | 17.02       | 3.244371782  | Up   | 0.879269057 | MYH11    |
| 2118   | 2242.14 | 25.504  | 3.91        | -2.705483022 | Down | 0.879194802 | ETV4     |
| 219    | 3088    | 24.002  | 103.6266667 | 2.110168775  | Up   | 0.879071818 | ALDH1B1  |
| 8436   | 3265    | 3.426   | 23.80666667 | 2.796768577  | Up   | 0.878396566 | SDPR     |
| 23266  | 5989.48 | 2.074   | 18.16       | 3.130276403  | Up   | 0.878238775 | ADGRL2   |
| 8869   | 2354.73 | 38.866  | 7.623333333 | -2.350014771 | Down | 0.877178327 | ST3GAL5  |
| 2026   | 2423    | 12.298  | 58.4        | 2.247544657  | Up   | 0.877171366 | ENO2     |
| 10570  | 2732    | 1.558   | 15.54666667 | 3.318838149  | Up   | 0.877159763 | DPYSL4   |
| 55504  | 4214    | 54.884  | 11.33333333 | -2.275813385 | Down | 0.877138879 | TNFRSF19 |
| 1075   | 2566.15 | 135.514 | 33.93166667 | -1.997737705 | Down | 0.876289593 | CTSC     |
| 144811 | 4180.09 | 0.838   | 12.535      | 3.902867942  | Up   | 0.875593456 | LACC1    |
| 727936 | 1547    | 0.45    | 10.52666667 | 4.547979859  | Up   | 0.874187261 | GXYLT2   |
| 27345  | 4725    | 15.64   | 1.601666667 | -3.287594677 | Down | 0.874157095 | KCNMB4   |
| 390    | 2742.83 | 341.064 | 86.39833333 | -1.980967096 | Down | 0.873913447 | RND3     |
| 4069   | 1516    | 23.186  | 3.566666667 | -2.700605655 | Down | 0.873850795 | LYZ      |
| 5118   | 1651    | 485.084 | 126.31      | -1.941265732 | Down | 0.872864601 | PCOLCE   |
| 9315   | 2028.92 | 24.354  | 98.08833333 | 2.009922806  | Up   | 0.87285764  | NREP     |
| 10468  | 1855.79 | 1.262   | 13.85166667 | 3.45627576   | Up   | 0.872850679 | FST      |

|        |         |         |             |              |      |             |          |
|--------|---------|---------|-------------|--------------|------|-------------|----------|
| 10687  | 4846    | 2.452   | 18.88       | 2.944827881  | Up   | 0.872811231 | PNMA2    |
| 26355  | 838     | 13.346  | 59.67       | 2.160598368  | Up   | 0.872741617 | FAM162A  |
| 4330   | 7569    | 0.1     | 8.836666667 | 6.465430359  | Up   | 0.872238079 | MN1      |
| 7980   | 2444    | 6.088   | 31.84333333 | 2.3869511    | Up   | 0.871697413 | TFPI2    |
| 8519   | 733     | 491.498 | 129.5066667 | -1.92415918  | Down | 0.871521058 | IFITM1   |
| 4222   | 2157    | 10.67   | 0.531666667 | -4.326894348 | Down | 0.871423599 | MEOX1    |
| 94122  | 4709    | 16.55   | 1.92        | -3.107653001 | Down | 0.871337742 | SYTL5    |
| 4609   | 2379    | 15.56   | 66.26333333 | 2.090368719  | Up   | 0.871179951 | MYC      |
| 4188   | 1662.48 | 0.754   | 11.62166667 | 3.946108647  | Up   | 0.87091774  | MDFI     |
| 3672   | 4811    | 57.602  | 13.13666667 | -2.132519656 | Down | 0.870335306 | ITGA1    |
| 5947   | 881.35  | 195.99  | 49.86333333 | -1.974728811 | Down | 0.870161272 | RBP1     |
| 1690   | 2558    | 12.24   | 0.915       | -3.741688004 | Down | 0.869984917 | COCH     |
| 2171   | 751     | 60.06   | 13.94833333 | -2.106311728 | Down | 0.869977956 | FABP5    |
| 3776   | 3274    | 1.484   | 14.74333333 | 3.312499744  | Up   | 0.869831767 | KCNK2    |
| 130497 | 1911    | 1.002   | 12.59666667 | 3.652087604  | Up   | 0.869564915 | OSR1     |
| 25891  | 3065.85 | 221.738 | 57.94       | -1.936224441 | Down | 0.869325908 | PAMR1    |
| 54331  | 3903    | 1.062   | 12.65833333 | 3.575231793  | Up   | 0.868975519 | GNG2     |
| 9120   | 3828    | 9.144   | 0.236666667 | -5.271896975 | Down | 0.868706346 | SLC16A6  |
| 55816  | 1766.03 | 0.146   | 8.755       | 5.906066904  | Up   | 0.868615849 | DOK5     |
| 1462   | 9549.9  | 39.244  | 154.065     | 1.972995149  | Up   | 0.868179603 | VCAN     |
| 7345   | 1141    | 82.858  | 306.2133333 | 1.8858242    | Up   | 0.867850099 | UCHL1    |
| 126868 | 3229    | 15.518  | 1.753333333 | -3.145770427 | Down | 0.867321035 | MAB21L3  |
| 6578   | 4234    | 38.624  | 7.95        | -2.280470816 | Down | 0.867170205 | SLCO2A1  |
| 7474   | 6151.31 | 176.57  | 46.21       | -1.933963249 | Down | 0.867061144 | WNT5A    |
| 9962   | 6953    | 3.22    | 20.74833333 | 2.687862859  | Up   | 0.866907994 | SLC23A2  |
| 1E+08  | 1221    | 26.25   | 4.743333333 | -2.468344262 | Down | 0.866501914 | LIMS4    |
| 2200   | 11695   | 33.65   | 129.115     | 1.939978206  | Up   | 0.864842789 | FBN1     |
| 1829   | 5885    | 0.946   | 11.875      | 3.64994352   | Up   | 0.864411185 | DSG2     |
| 341676 | 2963    | 28.766  | 5.775       | -2.316471772 | Down | 0.86433693  | NEK5     |
| 23240  | 5034    | 0.586   | 10.34166667 | 4.141424235  | Up   | 0.864035271 | KIAA0922 |
| 633    | 2470    | 118.78  | 418.8833333 | 1.818256545  | Up   | 0.864007425 | BGN      |
| 4257   | 945.12  | 49.854  | 183.0316667 | 1.876312106  | Up   | 0.863961016 | MGST1    |

|        |         |         |             |              |      |             |         |
|--------|---------|---------|-------------|--------------|------|-------------|---------|
| 9843   | 4302.62 | 2.142   | 16.485      | 2.944123502  | Up   | 0.863489964 | HEPH    |
| 586    | 9370.19 | 5.5     | 27.70166667 | 2.332469255  | Up   | 0.863063    | BCAT1   |
| 81606  | 2956    | 302.956 | 86.09166667 | -1.815162776 | Down | 0.862666203 | LBH     |
| 7263   | 1140.3  | 106.674 | 28.06333333 | -1.9264503   | Down | 0.861993271 | TST     |
| 3429   | 632.78  | 51.824  | 12.795      | -2.018040226 | Down | 0.861364427 | IFI27   |
| 10974  | 672     | 5.24    | 26.175      | 2.32055082   | Up   | 0.860111382 | ADIRF   |
| 3939   | 2225.19 | 312.362 | 1051.426667 | 1.751057371  | Up   | 0.859937348 | LDHA    |
| 3911   | 11445   | 38.798  | 8.91        | -2.122484948 | Down | 0.858709827 | LAMA5   |
| 4837   | 1579    | 43.362  | 153.8533333 | 1.827052496  | Up   | 0.858691263 | NNMT    |
| 3398   | 1402    | 19.436  | 75.43833333 | 1.956566465  | Up   | 0.8585706   | ID2     |
| 3655   | 5815.7  | 36.062  | 8.058333333 | -2.161926022 | Down | 0.858301427 | ITGA6   |
| 1535   | 778     | 360.054 | 106.1166667 | -1.762562031 | Down | 0.858299107 | CYBA    |
| 347    | 1148    | 11.552  | 0.99        | -3.544570312 | Down | 0.858250377 | APOD    |
| 1291   | 4246    | 172.69  | 578.5483333 | 1.744252948  | Up   | 0.858185404 | COL6A1  |
| 27147  | 3770.87 | 40.892  | 9.665       | -2.080976988 | Down | 0.857930154 | DENND2A |
| 115207 | 6255    | 1.53    | 13.70833333 | 3.16344962   | Up   | 0.857572804 | KCTD12  |
| 1903   | 4404    | 102.288 | 28.05333333 | -1.866392795 | Down | 0.857503191 | S1PR3   |
| 154141 | 4334    | 12.006  | 1.113333333 | -3.430798066 | Down | 0.857412693 | MBOAT1  |
| 9052   | 2856    | 137.762 | 38.975      | -1.821557065 | Down | 0.856964845 | GPRC5A  |
| 5817   | 5567.32 | 142.132 | 40.61       | -1.807324471 | Down | 0.856674788 | PVR     |
| 5152   | 1590    | 12.726  | 1.32        | -3.269169192 | Down | 0.856672468 | PDE9A   |
| 2192   | 2680.88 | 178.5   | 51.7        | -1.787687889 | Down | 0.856584291 | FBLN1   |
| 650    | 3191    | 21.762  | 3.926666667 | -2.470434113 | Down | 0.856298875 | BMP2    |
| 9022   | 813     | 85.302  | 22.97166667 | -1.892724035 | Down | 0.85612484  | CLIC3   |
| 2009   | 4479    | 20.32   | 3.416666667 | -2.572238993 | Down | 0.856038984 | EML1    |
| 10135  | 4593    | 66.4    | 17.265      | -1.943332907 | Down | 0.855243068 | NAMPT   |
| 8644   | 1251    | 0.838   | 10.675      | 3.671142016  | Up   | 0.854546931 | AKR1C3  |
| 745    | 5816.29 | 6.986   | 31.61666667 | 2.178146725  | Up   | 0.854419306 | MYRF    |
| 5764   | 1759.47 | 40.058  | 9.801666667 | -2.030991403 | Down | 0.854347372 | PTN     |
| 9627   | 2867.64 | 12.368  | 1.278333333 | -3.274276242 | Down | 0.854157095 | SNCAIP  |
| 79901  | 4203.75 | 15.362  | 59.60333333 | 1.956026961  | Up   | 0.853871679 | CYBRD1  |
| 65010  | 2567.45 | 20.008  | 3.453333333 | -2.53451546  | Down | 0.853686042 | SLC26A6 |

|        |         |         |             |              |      |             |              |
|--------|---------|---------|-------------|--------------|------|-------------|--------------|
| 51129  | 1869.01 | 4.084   | 21.735      | 2.411965324  | Up   | 0.85341919  | ANGPTL4      |
| 1306   | 5422    | 1.126   | 11.61       | 3.36608924   | Up   | 0.853047917 | COL15A1      |
| 51400  | 2744    | 179.946 | 53.73       | -1.74376429  | Down | 0.852683606 | PPME1        |
| 2354   | 3742.86 | 142.556 | 42.52166667 | -1.745258711 | Down | 0.851391113 | FOSB         |
| 9334   | 4743    | 9.104   | 37.04666667 | 2.024771277  | Up   | 0.85122636  | B4GALT5      |
| 10512  | 5189    | 3.612   | 19.99666667 | 2.468889733  | Up   | 0.851008238 | SEMA3C       |
| 5460   | 2075    | 12.734  | 1.438333333 | -3.146215706 | Down | 0.850850447 | POU5F1       |
| 8532   | 2306.14 | 95.574  | 27.36666667 | -1.804198479 | Down | 0.850476853 | CPZ          |
| 81619  | 5507.61 | 51.72   | 13.33833333 | -1.955143867 | Down | 0.850402599 | TSPAN14      |
| 6706   | 650     | 0.01    | 7.065       | 9.46454575   | Up   | 0.850168233 | SPRR2G       |
| 10516  | 2637    | 288.224 | 89.74333333 | -1.683313796 | Down | 0.85010326  | FBLN5        |
| 348    | 1234    | 12.498  | 1.408333333 | -3.149636499 | Down | 0.849288781 | APOE         |
| 2006   | 3726.09 | 7.762   | 32.635      | 2.071919701  | Up   | 0.849260935 | ELN          |
| 4771   | 5986    | 59.794  | 16.28666667 | -1.876309362 | Down | 0.848780601 | NF2          |
| 2745   | 1121.17 | 448.4   | 143.5866667 | -1.64286449  | Down | 0.848453417 | GLRX         |
| 27065  | 2453.94 | 0.302   | 8.085       | 4.742627319  | Up   | 0.848353637 | NSG1         |
| 2023   | 2206.56 | 306.132 | 938.0866667 | 1.615567357  | Up   | 0.848098387 | ENO1         |
| 2152   | 2383.61 | 74.958  | 237.7283333 | 1.665159494  | Up   | 0.848086785 | F3           |
| 3142   | 2308    | 24.27   | 4.976666667 | -2.285922444 | Down | 0.847576285 | HLX          |
| 715    | 2526    | 68.406  | 217.2266667 | 1.667006442  | Up   | 0.847534517 | C1R          |
| 84081  | 2526    | 33.996  | 8.435       | -2.010905034 | Down | 0.847392969 | NSRP1        |
| 1E+08  | 1155    | 117.218 | 35.34833333 | -1.729480028 | Down | 0.847186449 | LOC101928120 |
| 23414  | 4507    | 1.668   | 13.215      | 2.985985231  | Up   | 0.846754844 | ZFPM2        |
| 9249   | 1572.27 | 54.23   | 173.5633333 | 1.678299123  | Up   | 0.846752523 | DHRS3        |
| 6196   | 5667.27 | 7.774   | 31.95833333 | 2.039463159  | Up   | 0.84658313  | RPS6KA2      |
| 152    | 1958    | 23.456  | 4.766666667 | -2.298904362 | Down | 0.846193294 | ADRA2C       |
| 5214   | 2492.93 | 53.72   | 170.7633333 | 1.66846702   | Up   | 0.845689755 | PFKP         |
| 4504   | 599     | 0.01    | 6.79        | 9.407267764  | Up   | 0.845158371 | MT3          |
| 79365  | 3796    | 1.274   | 11.49333333 | 3.173360091  | Up   | 0.845070194 | BHLHE41      |
| 3570   | 3978.27 | 13.174  | 1.755       | -2.90815052  | Down | 0.844408864 | IL6R         |
| 283991 | 1604    | 50.544  | 13.805      | -1.872348954 | Down | 0.844097923 | UBALD2       |
| 9945   | 3115    | 4.718   | 22.94166667 | 2.28172288   | Up   | 0.844060796 | GFPT2        |

|        |         |         |             |              |      |             |          |
|--------|---------|---------|-------------|--------------|------|-------------|----------|
| 10669  | 1668.78 | 1.534   | 12.25833333 | 2.998392453  | Up   | 0.843868198 | CGREF1   |
| 8140   | 4575    | 15.926  | 56.69333333 | 1.831795133  | Up   | 0.843745214 | SLC7A5   |
| 4035   | 14905   | 43.03   | 137.15      | 1.672339877  | Up   | 0.843684882 | LRP1     |
| 3400   | 3891    | 5.014   | 23.56666667 | 2.232713813  | Up   | 0.842930734 | ID4      |
| 114801 | 2988    | 10.846  | 41.47666667 | 1.935136879  | Up   | 0.842919132 | TMEM200A |
| 8840   | 5194    | 1.324   | 11.68       | 3.141065247  | Up   | 0.842810071 | WISP1    |
| 9360   | 2717    | 37.804  | 9.538333333 | -1.986729786 | Down | 0.84249913  | PPIG     |
| 2744   | 4601.6  | 17.38   | 60.725      | 1.804862503  | Up   | 0.842459682 | GLS      |
| 143241 | 787     | 11.54   | 1.288333333 | -3.163065405 | Down | 0.842109293 | DYDC1    |
| 3620   | 1944    | 8.798   | 0.573333333 | -3.939729537 | Down | 0.842086089 | IDO1     |
| 56241  | 3201    | 18.904  | 3.746666667 | -2.335012    | Down | 0.841568627 | SUSD2    |
| 55214  | 3351.33 | 70.492  | 21.04833333 | -1.743753537 | Down | 0.84106973  | P3H2     |
| 4601   | 3393.09 | 4.882   | 22.77833333 | 2.22211799   | Up   | 0.840607959 | MXI1     |
| 5730   | 837     | 71.086  | 21.35833333 | -1.734766384 | Down | 0.839860773 | PTGDS    |
| 64770  | 4238.69 | 41.956  | 11.34666667 | -1.886608605 | Down | 0.839812043 | CCDC14   |
| 7678   | 2243.49 | 20.85   | 4.205       | -2.309869678 | Down | 0.839709943 | ZNF124   |
| 669    | 1800    | 47.246  | 13.205      | -1.83910789  | Down | 0.839531268 | BPGM     |
| 4286   | 4551.59 | 16.932  | 3.08        | -2.458750138 | Down | 0.839215686 | MITF     |
| 54532  | 6612    | 56.054  | 16.315      | -1.78061834  | Down | 0.839162316 | USP53    |
| 3814   | 731     | 25.084  | 5.806666667 | -2.110985301 | Down | 0.839099664 | KISS1    |
| 54978  | 3912    | 53.508  | 15.42166667 | -1.794795915 | Down | 0.838735352 | SLC35F6  |
| 3569   | 1192.27 | 23.47   | 76.44       | 1.703509936  | Up   | 0.83872607  | IL6      |
| 147968 | 3129    | 91.118  | 28.565      | -1.673487551 | Down | 0.838647175 | CAPN12   |
| 80210  | 2929.27 | 98.878  | 31.5        | -1.650297734 | Down | 0.838039216 | ARMC9    |
| 401089 | 4075    | 46.484  | 13.17166667 | -1.819296312 | Down | 0.837746838 | FOXL2NB  |
| 22801  | 5035    | 44.258  | 134.595     | 1.604614654  | Up   | 0.837298991 | ITGA11   |
| 79944  | 6111    | 24.178  | 5.601666667 | -2.109766868 | Down | 0.837117995 | L2HGDH   |
| 57088  | 3358.87 | 1.258   | 11.01833333 | 3.130702187  | Up   | 0.837013575 | PLSCR4   |
| 3554   | 4868.8  | 12.756  | 45.03833333 | 1.819977438  | Up   | 0.836749043 | IL1R1    |
| 6741   | 1735.29 | 94.626  | 30.32666667 | -1.641649708 | Down | 0.836561086 | SSB      |
| 4744   | 3721    | 0.458   | 8.028333333 | 4.131681015  | Up   | 0.836161968 | NEFH     |
| 9524   | 1181.5  | 119.334 | 39.25333333 | -1.604118071 | Down | 0.836043625 | TECR     |

|        |          |         |             |              |      |             |                 |
|--------|----------|---------|-------------|--------------|------|-------------|-----------------|
| 125965 | 1679     | 8.944   | 0.693333333 | -3.689299161 | Down | 0.836004177 | COX6B2          |
| 8862   | 3238     | 0.052   | 6.455       | 6.955761662  | Up   | 0.835605059 | APLN            |
| 4071   | 1712     | 18.344  | 60.33833333 | 1.717766587  | Up   | 0.835598097 | TM4SF1          |
| 10982  | 4220.89  | 6.38    | 25.92666667 | 2.022808405  | Up   | 0.835570252 | MAPRE2          |
| 200315 | 1390     | 12.32   | 1.753333333 | -2.812830052 | Down | 0.835479754 | APOBEC3A        |
| 84935  | 2394     | 13.778  | 47.51166667 | 1.785915333  | Up   | 0.835468152 | MEDAG           |
| 1E+08  | 1360     | 23.824  | 5.6         | -2.088916927 | Down | 0.83530804  | UPK3BL          |
| 3426   | 2218.31  | 10.376  | 37.87333333 | 1.867932018  | Up   | 0.835182736 | CFI             |
| 51776  | 6698.56  | 72.524  | 22.735      | -1.673543494 | Down | 0.834985497 | ZAK             |
| 57561  | 4294     | 4.222   | 20.11666667 | 2.252392786  | Up   | 0.834493561 | ARRDC3          |
| 4340   | 1942.08  | 10.792  | 1.248333333 | -3.11188713  | Down | 0.834393781 | MOG             |
| 140885 | 3892.94  | 14      | 47.61666667 | 1.766039803  | Up   | 0.833892563 | SIRPA           |
| 199731 | 2176     | 39.958  | 11.205      | -1.834341726 | Down | 0.833683722 | CADM4           |
| 729993 | 6698.07  | 24.982  | 6.153333333 | -2.021448928 | Down | 0.833602506 | SHISA9          |
| 6711   | 10077.66 | 18.122  | 58.71833333 | 1.696068835  | Up   | 0.833249797 | SPTBN1          |
| 57157  | 5017.72  | 57.092  | 17.51166667 | -1.704972204 | Down | 0.832627915 | PHTF2           |
| 11221  | 2680     | 13.622  | 2.256666667 | -2.593673299 | Down | 0.832326256 | DUSP10          |
| 11185  | 2606.61  | 16.254  | 3.131666667 | -2.375792233 | Down | 0.83219399  | INMT            |
| 728888 | 3497     | 89.376  | 29.42333333 | -1.602926782 | Down | 0.83214294  | NPIP11          |
| 136    | 1885     | 4.326   | 20.015      | 2.209976045  | Up   | 0.831961945 | ADORA2B         |
| 29126  | 3610.51  | 16.074  | 3.068333333 | -2.389201861 | Down | 0.83193642  | CD274           |
| 165631 | 4180     | 31.798  | 8.375       | -1.924774932 | Down | 0.831537301 | PARP15          |
| 9636   | 685      | 42.54   | 12.37       | -1.781974533 | Down | 0.831395754 | ISG15           |
| 85300  | 5049     | 10.598  | 1.275       | -3.05522288  | Down | 0.831323819 | ATCAY           |
| 51171  | 1277     | 11.756  | 1.68        | -2.806864126 | Down | 0.830975751 | HSD17B14        |
| 91574  | 1669.5   | 30.798  | 8.1         | -1.926842853 | Down | 0.830804038 | C12orf65        |
| 7078   | 5496     | 110.854 | 324.72      | 1.550535417  | Up   | 0.830681053 | TIMP3           |
| 1E+08  | 1948     | 6.102   | 0.01        | -9.25313837  | Down | 0.830630003 | TNFAIP8L2-SCNM1 |
| 353322 | 953      | 2.5     | 14.52166667 | 2.538207042  | Up   | 0.830502378 | ANKRD37         |
| 1346   | 783      | 35.478  | 9.878333333 | -1.844585126 | Down | 0.830117183 | COX7A1          |
| 55365  | 1047     | 0.884   | 9.22        | 3.382648476  | Up   | 0.829787678 | TMEM176A        |
| 28959  | 1323.85  | 0.832   | 9.115       | 3.453587223  | Up   | 0.829778397 | TMEM176B        |

|        |          |        |             |              |      |             |          |
|--------|----------|--------|-------------|--------------|------|-------------|----------|
| 10752  | 7430.36  | 0.01   | 6.061666667 | 9.24357071   | Up   | 0.829618285 | CHL1     |
| 7145   | 10107.03 | 27.546 | 82.105      | 1.575627244  | Up   | 0.829523147 | TNS1     |
| 51575  | 3205     | 14.832 | 2.685       | -2.465719156 | Down | 0.829165796 | ESF1     |
| 1012   | 4016.61  | 21.922 | 67.51       | 1.622721794  | Up   | 0.828989442 | CDH13    |
| 116039 | 1877     | 17.864 | 3.635       | -2.297027887 | Down | 0.828905906 | OSR2     |
| 8771   | 1155     | 44.814 | 13.465      | -1.734735274 | Down | 0.828402367 | TNFRSF6B |
| 379    | 1602     | 4.98   | 21.18666667 | 2.088938977  | Up   | 0.828286344 | ARL4D    |
| 55366  | 5240     | 0.88   | 9.065       | 3.364731591  | Up   | 0.827388328 | LGR4     |
| 54491  | 7064     | 9.448  | 0.985       | -3.261813335 | Down | 0.827019376 | FAM105A  |
| 716    | 2813.68  | 50.404 | 149.225     | 1.56587912   | Up   | 0.827012414 | C1S      |
| 23743  | 2459     | 20.65  | 4.855       | -2.088598581 | Down | 0.826710755 | BHMT2    |
| 3778   | 5468.14  | 2.686  | 14.615      | 2.443918619  | Up   | 0.826552964 | KCNMA1   |
| 5179   | 1365     | 13.752 | 2.343333333 | -2.553007356 | Down | 0.826371969 | PENK     |
| 63874  | 2543     | 10.722 | 36.70166667 | 1.775271539  | Up   | 0.826244344 | ABHD4    |
| 57568  | 6612     | 0.646  | 8.211666667 | 3.668068996  | Up   | 0.826112078 | SIPA1L2  |
| 4059   | 2572.73  | 59.178 | 19.21666667 | -1.622702832 | Down | 0.826030862 | BCAM     |
| 152330 | 5223     | 9.302  | 0.955       | -3.283968302 | Down | 0.825896276 | CNTN4    |
| 1759   | 3865.05  | 19.582 | 4.493333333 | -2.123670126 | Down | 0.825285996 | DNM1     |
| 3936   | 3808     | 25.998 | 6.65        | -1.966974397 | Down | 0.825230305 | LCP1     |
| 4853   | 11474    | 13.376 | 43.555      | 1.703191593  | Up   | 0.825065553 | NOTCH2   |
| 23643  | 621.27   | 2.316  | 13.53833333 | 2.547342985  | Up   | 0.824872955 | LY96     |
| 1917   | 2022     | 3.04   | 15.22       | 2.32382513   | Up   | 0.824631628 | EEF1A2   |
| 8379   | 2658.69  | 27.246 | 7.185       | -1.922984381 | Down | 0.824483119 | MAD1L1   |
| 4237   | 1124     | 62.968 | 21.03333333 | -1.58194134  | Down | 0.824415826 | MFAP2    |
| 150    | 3889     | 21.274 | 5.246666667 | -2.019618278 | Down | 0.824206985 | ADRA2A   |
| 10235  | 2262.13  | 9.664  | 1.081666667 | -3.159364477 | Down | 0.824000464 | RASGRP2  |
| 7262   | 937      | 50.524 | 16.24666667 | -1.636825112 | Down | 0.823768419 | PHLDA2   |
| 4061   | 1192.86  | 613.11 | 221.715     | -1.467439557 | Down | 0.823733612 | LY6E     |
| 139728 | 1551.68  | 1.026  | 9.311666667 | 3.182008684  | Up   | 0.823694164 | PNCK     |
| 442213 | 3140.78  | 9.892  | 1.231666667 | -3.005650376 | Down | 0.822726534 | PTCHD4   |
| 9669   | 4698     | 46.212 | 14.73666667 | -1.648857295 | Down | 0.822125537 | EIF5B    |
| 171019 | 5234     | 6.21   | 0.151666667 | -5.355617319 | Down | 0.822048962 | ADAMTS19 |



|        |         |         |             |              |      |             |           |
|--------|---------|---------|-------------|--------------|------|-------------|-----------|
| 5064   | 2847.62 | 11.944  | 38.99833333 | 1.707126398  | Up   | 0.822044321 | PALM      |
| 2256   | 2652.41 | 1.626   | 11.21833333 | 2.786459193  | Up   | 0.821728739 | FGF11     |
| 10397  | 3123    | 44.082  | 127.6316667 | 1.533724735  | Up   | 0.821712496 | NDRG1     |
| 26993  | 2208.01 | 41.672  | 12.97333333 | -1.683529133 | Down | 0.821670727 | AKAP8L    |
| 10848  | 3120.07 | 11.718  | 38.44833333 | 1.714194706  | Up   | 0.82163128  | PPP1R13L  |
| 6518   | 2454    | 0.104   | 6.028333333 | 5.857103759  | Up   | 0.821543102 | SLC2A5    |
| 8470   | 4731.81 | 0.5     | 7.47        | 3.901108243  | Up   | 0.820888734 | SORBS2    |
| 10221  | 3214.94 | 35.938  | 10.85333333 | -1.727371924 | Down | 0.820768071 | TRIB1     |
| 3371   | 8605    | 28.906  | 85.565      | 1.565651806  | Up   | 0.820148509 | TNC       |
| 9976   | 2052    | 26.51   | 7.223333333 | -1.875800017 | Down | 0.820076575 | CLEC2B    |
| 389177 | 1902    | 47.198  | 15.30333333 | -1.624879796 | Down | 0.82005337  | TMEM212   |
| 54737  | 4281    | 27.742  | 7.716666667 | -1.846022107 | Down | 0.820034807 | MPHOSPH8  |
| 3206   | 2648    | 18.462  | 4.296666667 | -2.103269087 | Down | 0.819860773 | HOXA10    |
| 57559  | 2094    | 34.962  | 10.525      | -1.731967483 | Down | 0.819767955 | STAMBPL1  |
| 5763   | 1224    | 838.634 | 311.8966667 | -1.426973187 | Down | 0.819262095 | PTMS      |
| 219623 | 5162    | 7.366   | 0.498333333 | -3.885698414 | Down | 0.819027729 | TMEM26    |
| 50863  | 3151.77 | 0.906   | 8.77        | 3.274993887  | Up   | 0.818872259 | NTM       |
| 6038   | 1831.14 | 6.756   | 25.19333333 | 1.898800785  | Up   | 0.818784082 | RNASE4    |
| 83982  | 469     | 118.778 | 41.74       | -1.50876514  | Down | 0.818702866 | IFI27L2   |
| 2318   | 9147.13 | 47.222  | 133.27      | 1.496821006  | Up   | 0.818688943 | FLNC      |
| 23710  | 1885    | 145.99  | 51.95166667 | -1.490627613 | Down | 0.818445295 | GABARAPL1 |
| 1303   | 9612.43 | 533.576 | 198.2683333 | -1.428239502 | Down | 0.818396566 | COL12A1   |
| 3134   | 1236.15 | 48.51   | 16.15       | -1.586748015 | Down | 0.818236454 | HLA-F     |
| 7089   | 2514.48 | 13.668  | 2.62        | -2.383163436 | Down | 0.818190045 | TLE2      |
| 445329 | 1397    | 13.884  | 2.723333333 | -2.349977788 | Down | 0.817995127 | SULT1A4   |
| 126433 | 2376    | 13.726  | 2.653333333 | -2.371033425 | Down | 0.817985845 | FBXO27    |
| 153769 | 3043    | 0.574   | 7.493333333 | 3.706484988  | Up   | 0.817303632 | SH3RF2    |
| 58498  | 619     | 0.366   | 6.798333333 | 4.215265548  | Up   | 0.817083188 | MYL7      |
| 115123 | 4196    | 0.292   | 6.488333333 | 4.473807665  | Up   | 0.816568047 | 3-Mar     |
| 83604  | 4068    | 15.234  | 45.72833333 | 1.585793537  | Up   | 0.81642882  | TMEM47    |
| 90199  | 1269    | 9.234   | 1.116666667 | -3.047757138 | Down | 0.816398654 | WFDC8     |
| 8613   | 3324    | 2.534   | 13.28666667 | 2.39049078   | Up   | 0.816194454 | PLPP3     |

|        |         |         |             |              |      |             |          |
|--------|---------|---------|-------------|--------------|------|-------------|----------|
| 58517  | 4303    | 45.426  | 15.23333333 | -1.576286609 | Down | 0.815639865 | RBM25    |
| 3394   | 2678    | 0.126   | 5.873333333 | 5.54268388   | Up   | 0.815491356 | IRF8     |
| 4728   | 824     | 110.612 | 39.38       | -1.489972892 | Down | 0.815454229 | NDUFS8   |
| 55690  | 4511    | 39.376  | 110.4316667 | 1.487765461  | Up   | 0.81541014  | PACS1    |
| 57608  | 9300    | 7.462   | 26.36       | 1.820716105  | Up   | 0.815150249 | KIAA1462 |
| 3728   | 3284.38 | 89.482  | 31.41666667 | -1.510067385 | Down | 0.814841629 | JUP      |
| 9630   | 2492    | 11.29   | 1.888333333 | -2.579860126 | Down | 0.814700081 | GNA14    |
| 387763 | 1361    | 31.47   | 9.533333333 | -1.722924532 | Down | 0.814669915 | C11orf96 |
| 7046   | 6479.49 | 6.89    | 24.87666667 | 1.852217297  | Up   | 0.81438914  | TGFBR1   |
| 9580   | 4088    | 13.458  | 2.698333333 | -2.318323541 | Down | 0.814191902 | SOX13    |
| 627    | 4081.85 | 6.45    | 23.725      | 1.879037022  | Up   | 0.813992342 | BDNF     |
| 8321   | 4350    | 2.684   | 13.36833333 | 2.316363035  | Up   | 0.813586263 | FZD1     |
| 1000   | 4018.97 | 61.912  | 168.0133333 | 1.440284758  | Up   | 0.813579302 | CDH2     |
| 3437   | 2503.45 | 31.698  | 9.79        | -1.695011051 | Down | 0.813147697 | IFIT3    |
| 3575   | 4617    | 16.766  | 3.876666667 | -2.112649938 | Down | 0.813001508 | IL7R     |
| 23768  | 8085    | 1.486   | 10.27666667 | 2.789866368  | Up   | 0.81280659  | FLRT2    |
| 55568  | 5966    | 10.304  | 32.95       | 1.677073967  | Up   | 0.812672004 | GALNT10  |
| 5670   | 1612    | 8.912   | 1.065       | -3.064895802 | Down | 0.812637197 | PSG2     |
| 3306   | 2802    | 68.892  | 23.89333333 | -1.527728325 | Down | 0.812428356 | HSPA2    |
| 1E+08  | 1739    | 7.16    | 0.525       | -3.76957026  | Down | 0.812198631 | MTRNR2L5 |
| 8605   | 2519.83 | 12.086  | 2.15        | -2.490928282 | Down | 0.812026917 | PLA2G4C  |
| 10100  | 3214.18 | 0.154   | 5.84        | 5.244966113  | Up   | 0.811959624 | TSPAN2   |
| 57106  | 1368    | 35.946  | 11.61333333 | -1.630049116 | Down | 0.811727579 | NAT14    |
| 283869 | 1033    | 6.976   | 0.48        | -3.861293729 | Down | 0.811611556 | NPW      |
| 84969  | 2490.67 | 2.084   | 11.90333333 | 2.51393845   | Up   | 0.811576749 | TOX2     |
| 60494  | 2518    | 12.826  | 2.498333333 | -2.36003343  | Down | 0.811381831 | CCDC81   |
| 79625  | 2911    | 0.182   | 5.903333333 | 5.019519451  | Up   | 0.811145144 | NDNF     |
| 1839   | 2381    | 17.606  | 4.341666667 | -2.019746301 | Down | 0.811066249 | HBEGF    |
| 9464   | 2368    | 24.714  | 7.033333333 | -1.813048034 | Down | 0.810980392 | HAND2    |
| 9242   | 2075    | 3.844   | 16.43166667 | 2.095798579  | Up   | 0.81096879  | MSC      |
| 3880   | 1490    | 667.59  | 258.6183333 | -1.368137794 | Down | 0.810632324 | KRT19    |
| 64359  | 2831.89 | 78.572  | 27.90666667 | -1.493405473 | Down | 0.810437406 | NXN      |

|        |         |         |             |              |      |             |               |
|--------|---------|---------|-------------|--------------|------|-------------|---------------|
| 51310  | 2244.65 | 38.118  | 12.73666667 | -1.581484668 | Down | 0.809787678 | SLC22A17      |
| 90226  | 1546    | 7.488   | 0.671666667 | -3.478763097 | Down | 0.809720385 | UCN2          |
| 51655  | 1740    | 9.118   | 1.156666667 | -2.978744247 | Down | 0.809660053 | RASD1         |
| 112817 | 2012    | 8.764   | 1.081666667 | -3.018333507 | Down | 0.809620606 | HOGA1         |
| 10630  | 2825.08 | 81.944  | 29.44666667 | -1.476533986 | Down | 0.809571876 | PDPN          |
| 11145  | 1324.11 | 2.904   | 14.13166667 | 2.282818266  | Up   | 0.809367676 | PLA2G16       |
| 10659  | 8029.42 | 0.114   | 5.598333333 | 5.61789166   | Up   | 0.809205244 | CELF2         |
| 341116 | 2296    | 9.192   | 1.211666667 | -2.923385935 | Down | 0.808861817 | MS4A10        |
| 24147  | 2701    | 30.624  | 9.645       | -1.666809592 | Down | 0.808687783 | FJX1          |
| 64409  | 3518    | 6.25    | 0.31        | -4.333516069 | Down | 0.808372201 | WBSCR17       |
| 284656 | 2082    | 6.564   | 0.405       | -4.018581426 | Down | 0.80800789  | EPHA10        |
| 513    | 877.61  | 137.458 | 51.89333333 | -1.405369759 | Down | 0.807272305 | ATP5D         |
| 58489  | 2408    | 29.606  | 9.316666667 | -1.668003802 | Down | 0.807075067 | ABHD17C       |
| 344148 | 7611    | 11.17   | 1.916666667 | -2.542957825 | Down | 0.806699153 | NCKAP5        |
| 4908   | 1349    | 3.044   | 14.205      | 2.222358568  | Up   | 0.806622578 | NTF3          |
| 55686  | 3213    | 11.046  | 1.873333333 | -2.559844498 | Down | 0.806365008 | MREG          |
| 440498 | 766     | 34.348  | 11.37833333 | -1.593936846 | Down | 0.806286112 | HSBP1L1       |
| 57414  | 1826.37 | 51.722  | 17.96666667 | -1.52545529  | Down | 0.805529644 | RHBDD2        |
| 114960 | 2058    | 7.228   | 0.636666667 | -3.504986369 | Down | 0.805513401 | TSGA13        |
| 3221   | 1689    | 0.26    | 5.958333333 | 4.518325308  | Up   | 0.805466992 | HOXC4         |
| 5046   | 4532    | 0.388   | 6.423333333 | 4.049193608  | Up   | 0.805420582 | PCSK6         |
| 165    | 4102    | 304.804 | 119.8066667 | -1.347173646 | Down | 0.80530456  | AEBP1         |
| 1E+08  | 2130    | 61.334  | 21.87833333 | -1.487184202 | Down | 0.805214062 | BCL2L2-PABPN1 |
| 84251  | 10174   | 7.758   | 0.795       | -3.28665801  | Down | 0.804965773 | SGIP1         |
| 54873  | 2601    | 19.548  | 5.176666667 | -1.916925681 | Down | 0.80469428  | PALMD         |
| 3931   | 1354    | 15.64   | 3.76        | -2.056435946 | Down | 0.804281239 | LCAT          |
| 116372 | 3624.41 | 13.728  | 2.92        | -2.233081184 | Down | 0.804223228 | LYPD1         |
| 7225   | 4612    | 16.304  | 4.086666667 | -1.996229478 | Down | 0.804158255 | TRPC6         |
| 127435 | 3186.39 | 1.292   | 9.061666667 | 2.810170352  | Up   | 0.803747535 | PODN          |
| 3091   | 4081.16 | 88.116  | 224.805     | 1.351198213  | Up   | 0.803557257 | HIF1A         |
| 10518  | 1624.93 | 18.076  | 4.58        | -1.980655959 | Down | 0.803137255 | CIB2          |
| 949    | 2747.67 | 78.896  | 29.27833333 | -1.430118727 | Down | 0.802970182 | SCARB1        |

|        |         |          |             |              |      |             |         |
|--------|---------|----------|-------------|--------------|------|-------------|---------|
| 2597   | 1421.19 | 2197.64  | 5432.58     | 1.30568244   | Up   | 0.802865762 | GAPDH   |
| 598    | 2606.27 | 84.36    | 31.57333333 | -1.417852515 | Down | 0.802828634 | BCL2L1  |
| 7431   | 2151    | 1286.506 | 3197.278333 | 1.313386155  | Up   | 0.802777584 | VIM     |
| 9295   | 2808.19 | 78.014   | 28.97666667 | -1.428841402 | Down | 0.802759021 | SRSF11  |
| 51574  | 2216.69 | 28.158   | 8.98        | -1.648757516 | Down | 0.802642998 | LARP7   |
| 23136  | 4000.08 | 0.602    | 7.003333333 | 3.540206364  | Up   | 0.802125537 | EPB41L3 |
| 6575   | 3672.77 | 51.59    | 18.19166667 | -1.503813722 | Down | 0.802106973 | SLC20A2 |
| 2879   | 939.03  | 262.162  | 104.3616667 | -1.328866695 | Down | 0.80178675  | GPX4    |
| 29886  | 4756    | 18.184   | 4.711666667 | -1.948360207 | Down | 0.801700893 | SNX8    |
| 388325 | 2206.85 | 12.746   | 2.563333333 | -2.313951563 | Down | 0.801668407 | SCIMP   |
| 3897   | 5059.24 | 30.086   | 9.9         | -1.60359188  | Down | 0.801417798 | L1CAM   |
| 253982 | 1562    | 19.164   | 5.19        | -1.884592275 | Down | 0.800496577 | ASPHD1  |
| 9147   | 4803    | 21.75    | 6.338333333 | -1.778839963 | Down | 0.800199559 | NEMF    |
| 10577  | 921     | 396.872  | 160.0866667 | -1.309820628 | Down | 0.800106741 | NPC2    |
| 5368   | 1022    | 0.01     | 4.958333333 | 8.953711452  | Up   | 0.800041768 | PNOC    |
| 283987 | 3369    | 7.228    | 0.706666667 | -3.354494742 | Down | 0.800037127 | HID1    |

**Table 3 The well-chosen top 8 pathway enrichment of DEGs between EnSC-Control and EnSC-EM-EC**

| No | Pathway                                    | DEGs genes with pathway annotation (473) | P value      | Q value     | The specific DEGs involved in pathways (Gene ID_Gene symbol)                                                                                                                                                                                   |
|----|--------------------------------------------|------------------------------------------|--------------|-------------|------------------------------------------------------------------------------------------------------------------------------------------------------------------------------------------------------------------------------------------------|
| 1  | <b>Complement and coagulation cascades</b> | 15 (3.17%)                               | 2.620016e-06 | 0.000662864 | 3075_CFH, 629_CFB, 5054_SERPINE1, 716_C1S, 5328_PLAU, 90199_WFDC8, 2159_F10, 7980_TFPI2, 2151_F2RL2, 81606_LBH, 718_C3, 2152_F3, 715_C1R, 5648_MASP1, 3426_CFI                                                                                 |
| 2  | <b>MicroRNAs in cancer</b>                 | 19 (4.02%)                               | 2.133831e-05 | 0.002699296 | 1545_CYP1B1, 3162_HMOX1, 4853_NOTCH2, 54541_DDIT4, 3371_TNC, 4609_MYC, 7078_TIMP3, 7148_TNXB, 101928120_LOC101928120, 57493_HEG1, 5328_PLAU, 7431_VIM, 23414_ZFPM2, 400916_CHCHD10, 2744_GLS, 9358_ITGBL1, 57451_TENM2, 5155_PDGF, 3236_HOXD10 |
| 3  | <b>ECM-receptor interaction</b>            | 14 (2.96%)                               | 6.356155e-05 | 0.004108390 | 1311_COMP, 1291_COL6A1, 3371_TNC, 7148_TNXB, 3655_ITGA6, 7058_THBS2, 2335_FN1, 3672_ITGA1, 9358_ITGBL1, 22801_ITGA11, 3908_LAMA2, 1690_COCH, 57451_TENM2, 3911_LAMA5                                                                           |
| 4  | <b>Glycolysis / Gluconeogenesis</b>        | 10 (2.11%)                               | 6.495479e-05 | 0.004108390 | 2597_GAPDH, 2023_ENO1, 669_BPGM, 3939_LDHA, 2026_ENO2, 5230_PGK1, 5214_PFKP, 219_ALDH1B1, 220_ALDH1A3, 5236_PGM1                                                                                                                               |
| 5  | <b>HIF-1 signaling pathway</b>             | 13 (2.75%)                               | 0.0001239916 | 0.006273975 | 3162_HMOX1, 2597_GAPDH, 2023_ENO1, 3939_LDHA, 1906_EDN1, 2026_ENO2, 5230_PGK1, 5054_SERPINE1, 5214_PFKP, 7076_TIMP1, 3091_HIF1A, 3570_IL6R, 3569_IL6                                                                                           |

| No | Pathway                                | DEGs genes with pathway annotation (473) | P value      | Q value     | Differentially expressed genes                                                                                                                                                                                                                                                          |
|----|----------------------------------------|------------------------------------------|--------------|-------------|-----------------------------------------------------------------------------------------------------------------------------------------------------------------------------------------------------------------------------------------------------------------------------------------|
| 6  | PI3K-Akt signaling pathway             | 24 (5.07%)                               | 0.0008668201 | 0.031329355 | 1311_COMP, 2256_FGF11, 1291_COL6A1, 54541_DDIT4, 3575_IL7R, 3371_TNC, 4609_MYC, 7148_TNXXB, 54331_GNG2, 3655_ITGA6, 7058_THBS2, 2335_FN1, 3672_ITGA1, 4803_NGF, 3570_IL6R, 3569_IL6, 9358_ITGBL1, 22801_ITGA11, 3908_LAMA2, 598_BCL2L1, 1690_COCH, 57451_TENM2, 3911_LAMA5, 5155_PDGFBB |
| 7  | Cytokine-cytokine receptor interaction | 17 (3.59%)                               | 0.001409798  | 0.043070608 | 3554_IL1R1, 1439_CSF2RB, 6347_CCL2, 6352_CCL5, 6376_CX3CL1, 3575_IL7R, 8771_TNFRSF6B, 650_BMP2, 27242_TNFRSF21, 9244_CRLF1, 6387_CXCL12, 55504_TNFRSF19, 3570_IL6R, 3569_IL6, 6372_CXCL6, 7046_TGFBR1, 5155_PDGFBB                                                                      |
| 8  | Focal adhesion                         | 19 (4.02%)                               | 0.001532156  | 0.043070608 | 1311_COMP, 1291_COL6A1, 3371_TNC, 58498_MYL7, 7148_TNXXB, 101928120_LOC101928120, 3655_ITGA6, 2318_FLNC, 11346_SYNPO, 7058_THBS2, 2335_FN1, 3672_ITGA1, 9358_ITGBL1, 22801_ITGA11, 3908_LAMA2, 1690_COCH, 57451_TENM2, 3911_LAMA5, 5155_PDGFBB                                          |
